# Supplementary material for: Efficacy and safety of pharmacological agents in the treatment of erythema migrans in early Lyme borreliosis—systematic review protocol
Source: Springer Nature journal article supplement (doi:10.1186/s13643-016-0251-3), 2016-05-03
Supplement: MOESM2 [file 13643_2016_251_MOESM2_ESM.pdf]

## **Additional File 2: Search strategies**

**Database(s): Ovid MEDLINE(R), Ovid OLDMEDLINE(R)**

- 1 exp Lyme Disease/
- 2 lyme\*.mp.
- 3 exp Borrelia/
- 4 borreli\*.mp.
- 5 tick\*.mp.
- 6 (erythem\* adj2 migran\*).mp.
- 7 dermat\*.mp.
- 8 cutan\*.mp.
- 9 exp Erythema/
- 10 erythem\*.mp.
- 11 exp Skin Diseases, Bacterial/
- 12 skin diseas\*.mp.
- 13 acroderm\* chron\* atrophy\*.mp.
- 14 mult\* erythem\* migran\*.mp.
- 15 Scleroderma, Localized/
- 16 local\* sclero\*.mp.
- 17 circ\* sclero\*.mp.
- 18 morphea.mp.
- 19 Pseudolymphoma/
- 20 pseudolymphom\*.mp.
- 21 lymphocytom\*.mp.
- 22 (cutan\* adj2 lymphocyt\*).mp.
- 23 Lichen sclerosus/

- 24 Lichen sclero\*.mp.
- 25 atroph\*.mp.
- 26 aneto\*.mp.
- 27 granuloma\*.mp.
- 28 neuroborreli\*.mp.
- 29 arthritis.mp.
- 30 carditis.mp.
- 31 early locali\*.mp.
- 32 (early adj2 lyme\*).mp.
- 33 (early adj2 borrel\*).mp.
- 34 acute lyme\*.mp.
- 35 (acute adj2 borrel\*).mp.
- 36 early dissemin\*.mp.
- 37 late dissemin\*.mp.
- 38 late lyme\*.mp.
- 39 (late adj2 borrel\*).mp.
- 40 (dissemin\* adj2 borrel\*).mp.
- 41 (chron\* adj2 borrel\*).mp.
- 42 chron\* lyme\*.mp.
- 43 (subacute adj2 borrel\*).mp.
- 44 subacute lyme\*.mp.
- 45 (refractory adj2 borrel\*).mp.
- 46 refractory lyme\*.mp.
- 47 or/1-5
- 48 or/6-12
- 49 or/13-30
- 50 or/31-46

- 51 48 or 50
- 52 49 or 50
- 53 47 and 51
- 54 47 and 52
- 55 53 or 54

[mp=title, abstract, original title, name of substance word, subject heading word, keyword heading word, protocol supplementary concept word, rare disease supplementary concept word, unique identifier]

**Database(s): Ovid MEDLINE(R) In-Process & Other Non-Indexed Citations**

- 1 lyme\*.mp.
- 2 borreli\*.mp.
- 3 tick\*.mp.
- 4 (erythem\* adj2 migran\*).mp.
- 5 dermat\*.mp.
- 6 cutan\*.mp.
- 7 erythem\*.mp.
- 8 skin diseas\*.mp.
- 9 acroderm\* chron\* atrophy\*.mp.
- 10 mult\* erythem\* migran\*.mp.
- 11 local\* sclero\*.mp.
- 12 circ\* sclero\*.mp.
- 13 morphea.mp.
- 14 pseudolymphom\*.mp.
- 15 lymphocytom\*.mp.
- 16 (cutan\* adj2 lymphocyt\*).mp.
- 17 Lichen sclero\*.mp.

18 atroph\*.mp.  
19 aneto\*.mp.  
20 granuloma\*.mp.  
21 neuroborreli\*.mp.  
22 arthritis.mp.  
23 carditis.mp.  
24 early locali\*.mp.  
25 (early adj2 lyme\*).mp.  
26 (early adj2 borrel\*).mp.  
27 acute lyme\*.mp.  
28 (acute adj2 borrel\*).mp.  
29 early dissem\*.mp.  
30 late dissem\*.mp.  
31 late lyme\*.mp.  
32 (late adj2 borrel\*.mp.  
33 (dissem\* adj2 borrel\*).mp.  
34 (chron\* adj2 borrel\*).mp.  
35 chron\* lyme\*.mp.  
36 (subacute adj2 borrel\*).mp.  
37 subacute lyme\*.mp.  
38 (refractory adj2 borrel\*).mp.  
39 refractory lyme\*.mp.  
40 or/1-3  
41 or/4-8  
42 or/9-23  
43 or/24-39  
44 41 or 43

- 45 42 or 43
- 46 40 and 44
- 47 40 and 45
- 48 46 or 47

[mp=title, abstract, original title, name of substance word, subject heading word, keyword heading word, protocol supplementary concept word, rare disease supplementary concept word, unique identifier]

**Database(s): Ovid MEDLINE(R) Daily Update**

- 1 exp Lyme Disease/
- 2 lyme\*.mp.
- 3 exp Borrelia/
- 4 borreli\*.mp.
- 5 tick\*.mp.
- 6 (erythem\* adj2 migran\*).mp.
- 7 or/1-6

[mp=title, abstract, original title, name of substance word, subject heading word, keyword heading word, protocol supplementary concept word, rare disease supplementary concept word, unique identifier]

**Database(s): Pubmed MEDLINE(R) Publisher**

- 1 lyme\*[tw]
- 2 borreli\*[tw]
- 3 tick\*[tw]
- 4 erythem\*[tw]
- 5 migran\*[tw]
- 6 #4 AND #5
- 7 #1 OR #2 OR #3 OR #6

8 #7 AND publisher[sb]

[tw= Title, Abstract, MeSH, Subheadings, Publication Types, Other Terms, Chemical Names of Substances, Secondary Source Identifier, Personal Name as Subject; sb= Subset]

**Database(s): Ovid Embase**

- 1 exp Lyme Disease/
- 2 lyme\*.mp.
- 3 exp Borrelia infection/
- 4 borreli\*.mp.
- 5 tick\*.mp.
- 6 (erythem\* adj2 migran\*).mp.
- 7 dermat\*.mp.
- 8 cutan\*.mp.
- 9 exp erythema/
- 10 erythem\*.mp.
- 11 exp bacterial skin disease/
- 12 skin diseas\*.mp.
- 13 acroderm\* chron\* atrophy\*.mp.
- 14 mult\* erythem\* migran\*.mp.
- 15 exp localized scleroderma/
- 16 local\* slcero\*.mp.
- 17 circ\* sclero\*.mp.
- 18 exp morphea/
- 19 morphea.mp.
- 20 exp pseudolymphoma/
- 21 pseudolymphom\*.mp.
- 22 lymphocytom\*.mp.

- 23 (cutan\* adj2 lymphocyt\*).mp.
- 24 exp lichen sclerosus et atrophicus/
- 25 Lichen sclero\*.mp.
- 26 atroph\*.mp.
- 27 aneto\*.mp.
- 28 granuloma\*.mp.
- 29 neuroborreli\*.mp.
- 30 arthritis.mp.
- 31 carditis.mp.
- 32 early locali\*.mp.
- 33 (early adj2 lyme\*).mp.
- 34 (early adj2 borrel\*).mp.
- 35 acute lyme\*.mp.
- 36 (acute adj2 borrel\*).mp.
- 37 early dissemin\*.mp.
- 38 late dissemin\*.mp.
- 39 late lyme\*.mp.
- 40 (late adj2 borrel\*).mp.
- 41 (dissemin\* adj2 borrel\*).mp.
- 42 (chron\* adj2 borrel\*).mp.
- 43 chron\* lyme\*.mp.
- 44 (subacute adj2 borrel\*).mp.
- 45 subacute lyme\*.mp.
- 46 (refractory adj2 borrel\*).mp.
- 47 refractory lyme\*.mp.
- 48 or/1-5
- 49 or/6-12

- 50 or/13-31
- 51 or/32-47
- 52 49 or 51
- 53 50 or 51
- 54 48 and 52
- 55 48 and 53
- 56 54 or 55

[mp=title, abstract, original title, name of substance word, subject heading word, keyword heading word, protocol supplementary concept word, rare disease supplementary concept word, unique identifier]

**Database(s): Central**

- 1 MeSH descriptor: [Borrelia] explode all trees
- 2 MeSH descriptor: [Lyme Disease] explode all trees
- 3 \*borreli\*
- 4 lyme\*
- 5 tick\*
- 6 erythem\* near/2 migran\*
- 7 #1 OR #2 OR #3 OR #4 OR #5 OR #6
- 8 Trials
